# Supplementary material
Source: publisher site journal article supplement (https://www.spandidos-publications.com/5268/downloadSupplementary)
Supplement: Supplementary file 1 [file downloadSupplementary]

## Sheet: Medium_(Low+High)_diffLab
Table SIV. lncRNAs dysregulated in the intermediate risk group
	logFC	AveExpr	t	P.Value
CTD-2510F5.4	-0.73306	2.4982	-7.36874	1.00525e-12
LINC00973	-0.71314	0.646556	-6.1459	1.93408e-09
KIFC1	-0.655838	2.81138	-6.54299	1.85997e-10
RP11-760H22.2	0.504029	2.19632	5.87765	8.81631e-09
LHFPL3-AS2	0.517705	1.21984	4.32611	1.92186e-05
RP11-462G2.1	0.574005	1.95555	2.66216	0.00807902
RP11-469H8.6	0.588955	1.05594	5.20739	3.07908e-07
HAGLR	0.609707	2.8428	4.3517	1.71969e-05
RP11-66N24.6	0.650353	1.84033	4.45456	1.09415e-05
SFTA1P	0.661768	3.57567	3.55285	0.00042682
AC008268.1	0.663354	1.36895	4.27839	2.36106e-05
SFTA3	0.776791	4.40614	4.82642	1.98532e-06
SLC44A4	1.00212	4.98648	7.52366	3.58891e-13
